# Supplementary material
Source: PubMed Central journal article supplement (PMC4795020)
Supplement: rspb20152332supp6.pdf [file rspb20152332supp6.pdf]

Table S3: List of species recorded exclusively below 50 m depth.

| Family           | Genus          | Species       | Upper Depth | Region      |
|------------------|----------------|---------------|-------------|-------------|
| Acanthuridae     | Naso           | annulatus     | 64          | NWHI        |
| Apogonidae       | Ostorhinchus   | maculiferus   | 61          | NWHI        |
| Chaetodontidae   | Chaetodon      | tinkeri       | 62          | NWHI        |
| Labridae         | Bodianus       | sanguineus    | 52          | NWHI        |
| Mullidae         | Parupeneus     | chrysonemus   | 56          | NWHI        |
| Serranidae       | Liopropoma     | aurora        | 53          | NWHI        |
| Serranidae       | Luzonichthys   | earlei        | 58          | NWHI        |
| Serranidae       | Odontanthias   | fuscipinnis   | 52          | NWHI        |
| Tetraodontidae   | Canthigaster   | rivulata      | 54          | NWHI        |
| Pomacentridae    | Chromis        | struhsakeri   | 85          | NWHI        |
| Carangidae       | Pseudocaranx   | dentex        | 65          | NWHI        |
| Cheilodactylidae | Cheilodactylus | vittatus      | 62          | NWHI        |
| Serranidae       | Holanthias     | fuscipinnis   | 62          | NWHI        |
| Pentaceroideae   | Evistias       | acutirostris  | 55          | NWHI        |
| Apogonidae       | Cheilodipterus | isostigmus    | 50          | Pohnpei     |
| Balistidae       | Balistoides    | conspicillum  | 60          | Pohnpei     |
| Caesionidae      | Caesio         | caeruleaurea  | 50          | Pohnpei     |
| Caesionidae      | Caesio         | teres         | 60          | Pohnpei     |
| Labridae         | Chelinius      | undulatus     | 60          | Pohnpei     |
| Lutjanidae       | Macolor        | macularis     | 50          | Pohnpei     |
| Serranidae       | Pseudanthias   | cooperi       | 50          | Pohnpei     |
| Serranidae       | Pseudanthias   | pleurotaenia  | 50          | Pohnpei     |
| Serranidae       | Pseudanthias   | randalli      | 50          | Pohnpei     |
| Serranidae       | Pseudanthias   | ventralis     | 60          | Pohnpei     |
| Apogonidae       | Apogon         | lachneri      | 50          | Puerto Rico |
| Carangidae       | Caranx         | latus         | 73          | Puerto Rico |
| Carangidae       | Caranx         | lugubris      | 52          | Puerto Rico |
| Chaetodontidae   | Chaetodon      | ocellatus     | 70          | Puerto Rico |
| Epinephelidae    | Epinephelus    | itajara       | 55          | Puerto Rico |
| Haemulidae       | Haemulon       | striatum      | 70          | Puerto Rico |
| Labridae         | Halichoeres    | cianocephalus | 52          | Puerto Rico |
| Pomacanthidae    | Holacanthus    | tricolor      | 60          | Puerto Rico |
| Serranidae       | Hypoplectrus   | puella        | 50          | Puerto Rico |
| Serranidae       | Liopropoma     | carmabi       | 61          | Puerto Rico |
| Serranidae       | Liopropoma     | rubre         | 50          | Puerto Rico |
| Serranidae       | Lipogramma     | klayi         | 80          | Puerto Rico |
| Lutjanidae       | Lutjanus       | buccanella    | 52          | Puerto Rico |
| Serranidae       | Paranthias     | furcifer      | 50          | Puerto Rico |
| Labridae         | Scarus         | guacamaia     | 71          | Puerto Rico |
| Serranidae       | Serranus       | chionaraia    | 60          | Puerto Rico |
| Serranidae       | Serranus       | luciopercanus | 70          | Puerto Rico |
| Pomacentridae    | Stegastes      | variabilis    | 60          | Puerto Rico |
| Carangidae       | Trachinotus    | falcatus      | 91          | Puerto Rico |
